# Supplementary material
Source: Springer Nature journal article supplement (https://www.springermedizin.de/resource/supplementary/13013_2010_322_MOESM2_ESM.pdf/9631624)

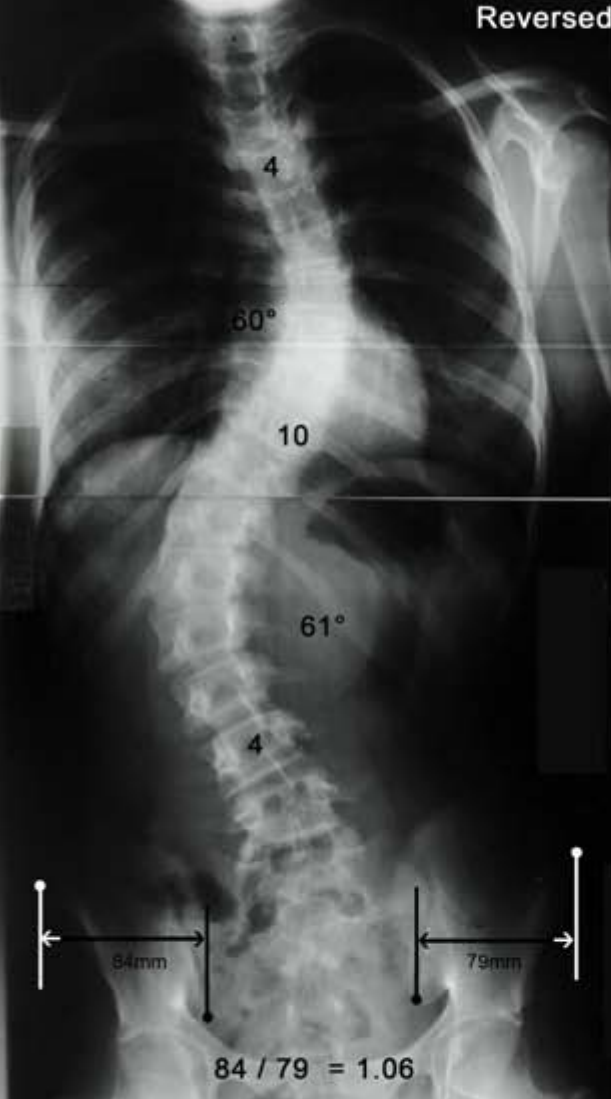

2A

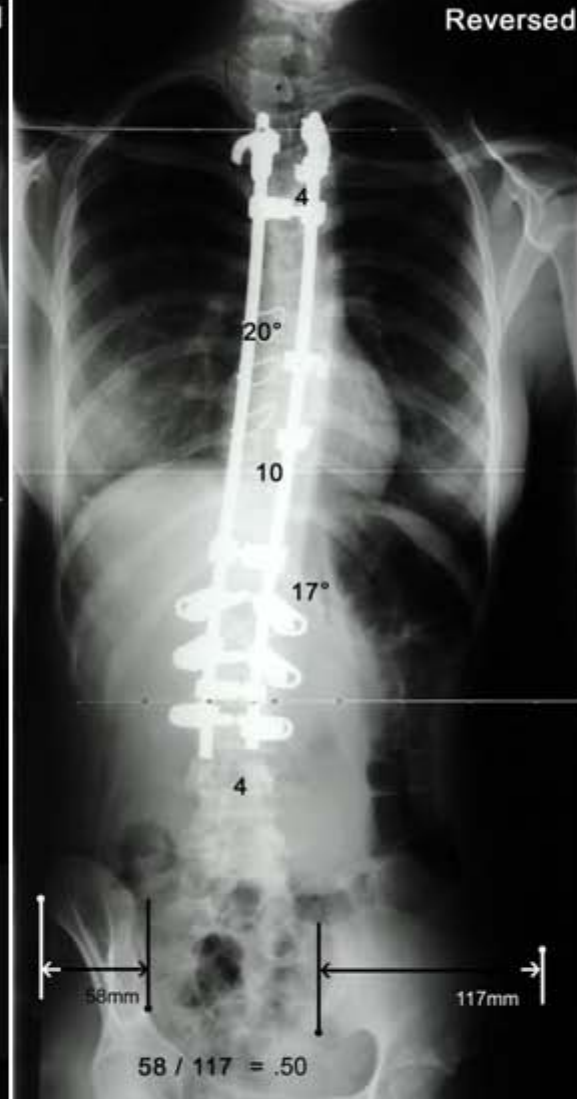

2B

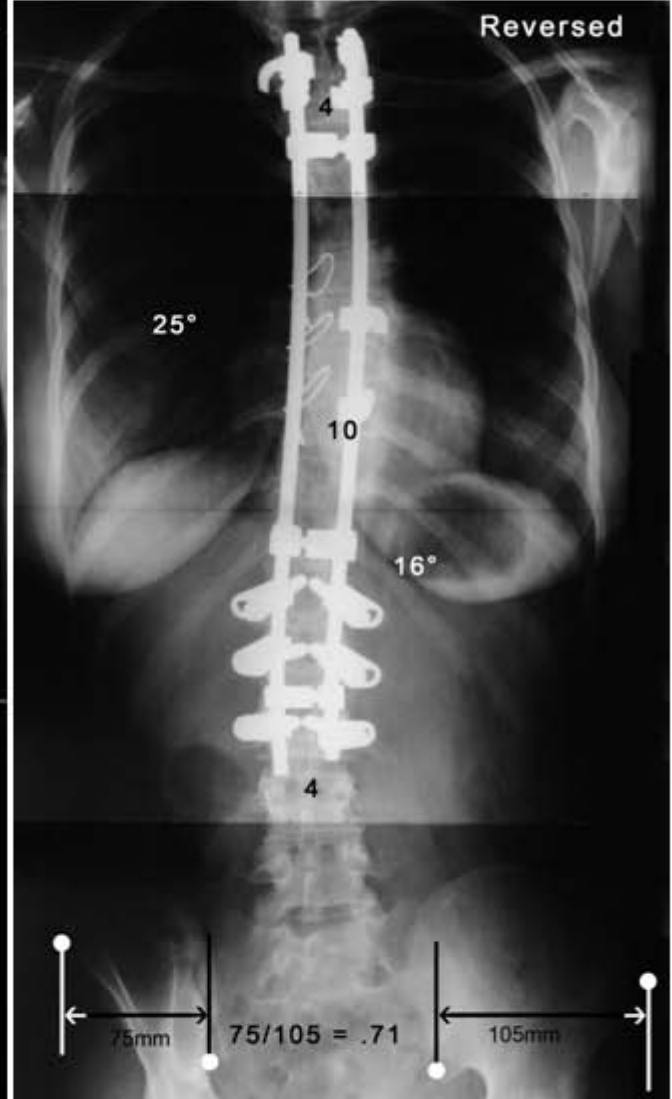

2C

Supplement: MOESM2 [file 9631624]
